# Supplementary material for: 1,2-Dibenzoylhydrazine as a Multi-Inhibitor Compound: A Morphological and Docking Study
Source: MDPI journal article supplement (doi:10.3390/ijms24021425), 2023-01-11
Supplement: s1 [file s1]

# 1,2-Dibenzoylhydrazine as a multi-inhibitor compound: a morphological and docking study

Vincenzo Patamia <sup>1</sup>, Giuseppe Floresta <sup>1</sup>, Chiara Zagni <sup>1</sup>, Venerando Pistarà <sup>1</sup>, Francesco Punzo <sup>1</sup> and Antonio Rescifina <sup>1,\*</sup>

<sup>1</sup> Department of Drug and Health Sciences, University of Catania, V.le A. Doria 6, 95125 Catania, Italy; [vincenzo.patamia@unict.it](mailto:vincenzo.patamia@unict.it) (Vi.Pa.), [giuseppe.floresta@unict.it](mailto:giuseppe.floresta@unict.it) (G.F.), [chiara.zagni@unict.it](mailto:chiara.zagni@unict.it) (C.Z.), [vpistara@unict.it](mailto:vpistara@unict.it) (V.P.), [fpunzo@unict.it](mailto:fpunzo@unict.it) (F.P.), [arescifina@unict.it](mailto:arescifina@unict.it) (A.R.)

\* Correspondence.; email address: [arescifina@unict.it](mailto:arescifina@unict.it) (A.R.); Tel. +39 095 738 4245)

## Table of contents

|                                                                                           |    |
|-------------------------------------------------------------------------------------------|----|
| <b>Figure S1.</b> Workflow of the procedure used for the molecular modeling studies ..... | S3 |
| <b>Figure S2.</b> Ponasterone A within the EcR receptor .....                             | S3 |
| <b>Figure S3.</b> Thiourea within the urease receptor.....                                | S4 |
| <b>Figure S4.</b> ChEMBL3259898 within the HIV integrase receptor. ....                   | S4 |

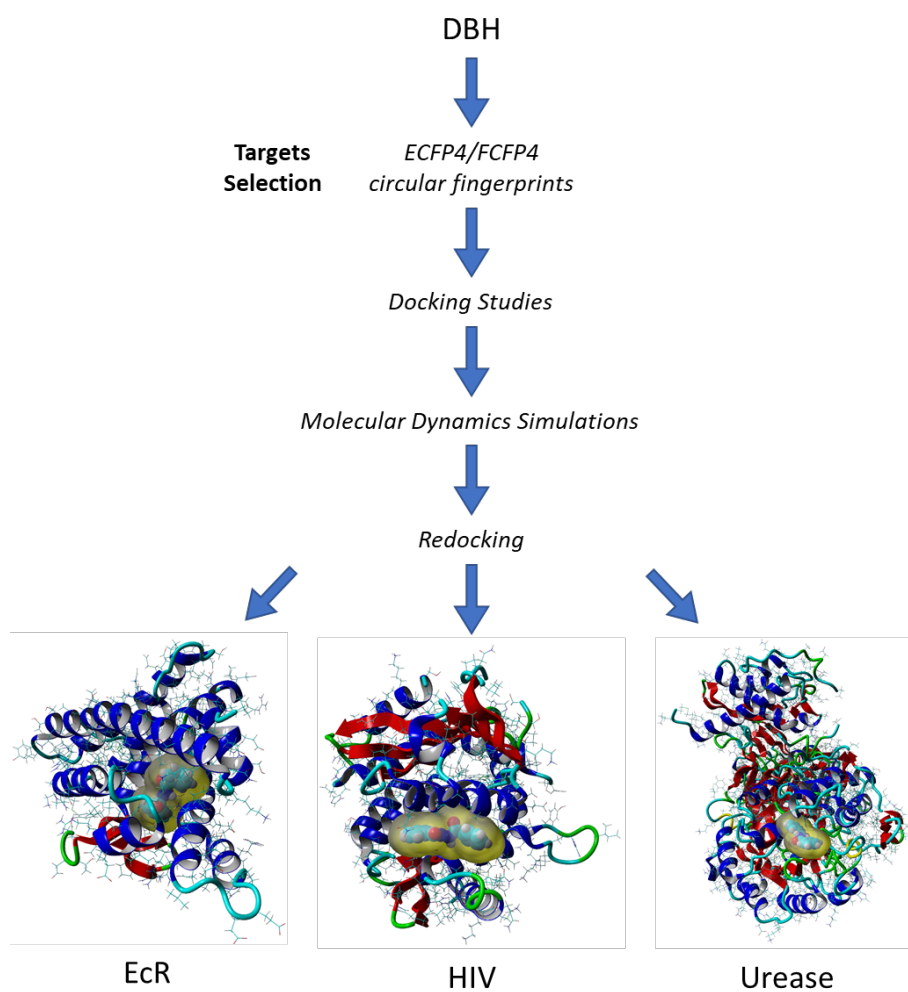

**Figure S1.** Workflow of the procedure used for the molecular modeling studies.

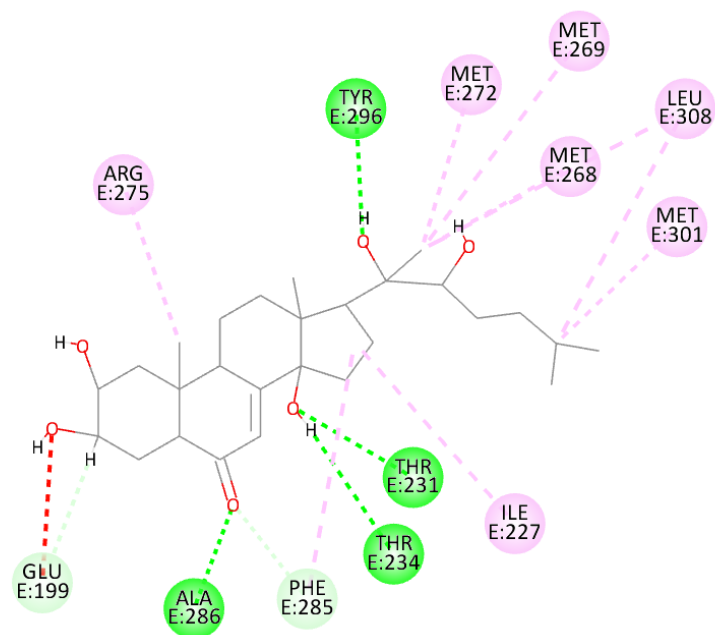

**Figure S2.** 2D picture of the Ponasterone A interactions within the EcR receptor.

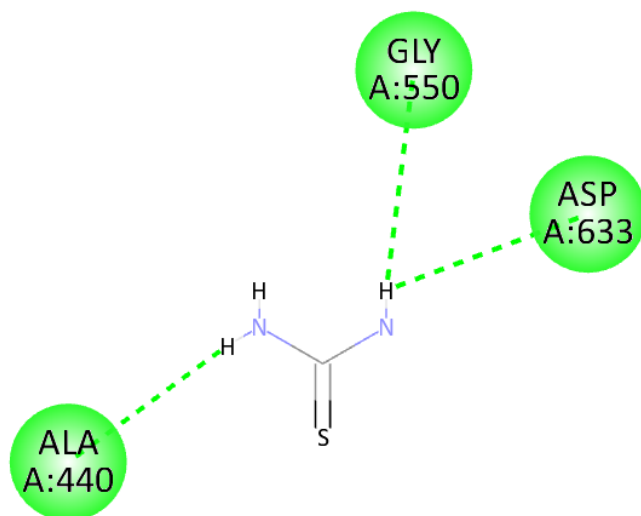

**Figure S3.** 2D picture of the Thiourea interactions within the urease receptor.

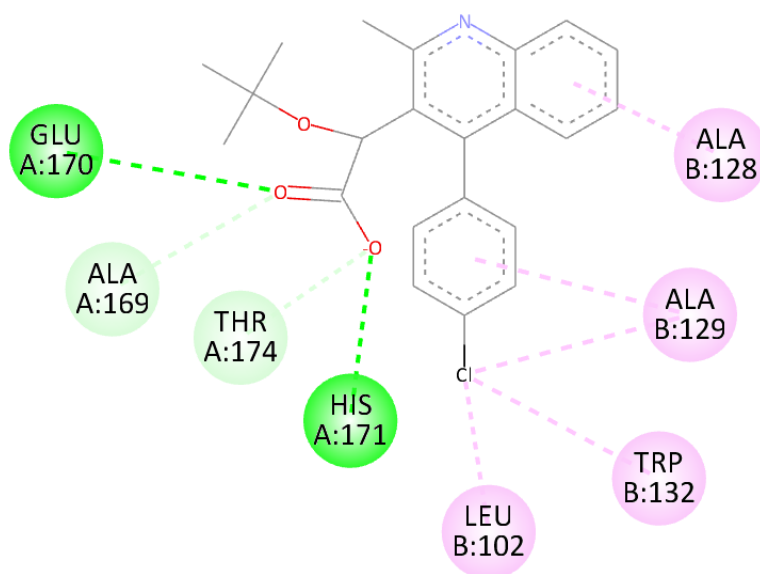

**Figure S4.** 2D picture of the CHEMBL3259898 interactions within the HIV integrase receptor.
